# Supplementary material for: Flower development and sex specification in wild grapevine
Source: PubMed Central journal article supplement (PMC4363350; doi:10.1186/1471-2164-15-1095), 2014-12-12
Supplement: 12864_2014_6934_MOESM2_ESM.pdf [file 12864_2014_6934_MOESM2_ESM.pdf]

0.0 1.0 ≥ 4.0

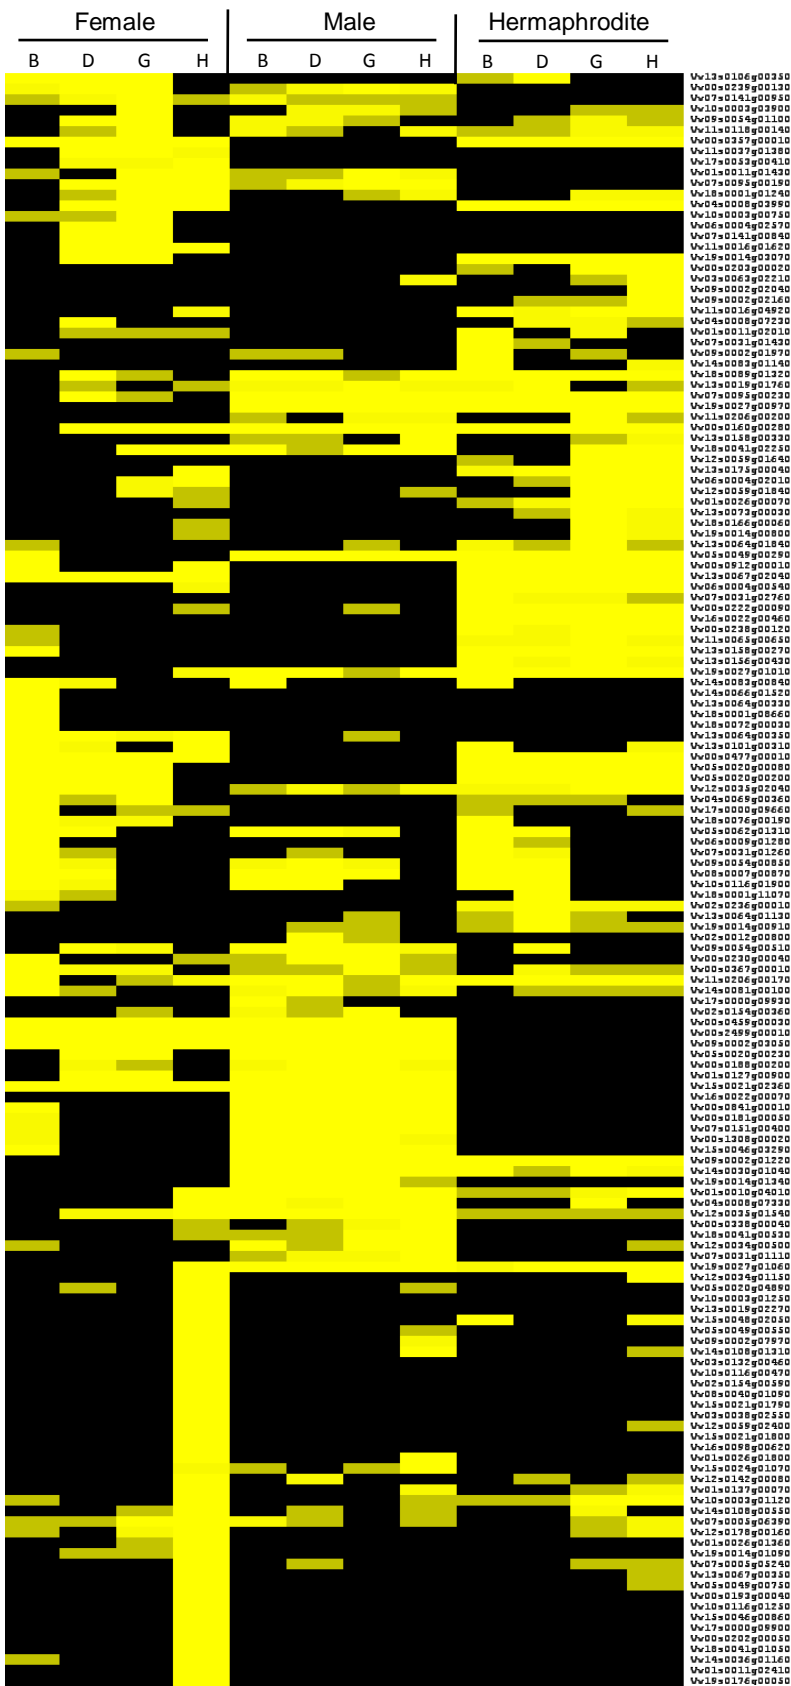

Additional file 2. Expression profile of "Unknown" functional category.
